# Supplementary material for: Association of Socioeconomic Status and Brain Injury With Neurodevelopmental Outcomes of Very Preterm Children
Source: PubMed Central journal article supplement (PMC6503490; doi:10.1001/jamanetworkopen.2019.2914), 2019-05-03
Supplement: jamanetwopen-2-e192914-s001.pdf [file jamanetwopen-2-e192914-s001.pdf]

## Supplementary Online Content

Benavente-Fernández I, Synnes A, Grunau RE, et al. Association of socioeconomic status and brain injury with neurodevelopmental outcomes of very preterm children. *JAMA Netw Open*. 2019;2(5):e192914. doi:10.1001/jamanetworkopen.2019.2914

**eMethods.** Statistical Analysis

**eFigure 1.** Cohort Flow

**eFigure 2.** Predicted IQ According to Maternal Level of Education and the Presence of Brain Injury (Adjusted for GA)

**eTable 1.** Missing Values on the Dependent Variables

**eTable 2.** Agreement of the Cognitive Scores at Different Time Points

**eTable 3.** Missing Data of Independent Variables in the Model Related to Cognitive Scores at 4.5 Years (n=170) as Dependent Variable

**eTable 4.** Estimated Model After Multiple Imputation

**eTable 5.** Other Indexes of SES and Maternal Ethnicity Tested as Independent Variables With White Matter Injury, Severe Intraventricular Hemorrhage, Chronic Lung Disease and Gestational Age at Birth for the Prediction of FSIQ at 4.5 Years

**eTable 6.** Regression Model Obtained for the 4.5 Year-Outcome Final Model Applied to the 18 and 36 Months Cognitive Outcome

**eTable 7.** Estimated Cognitive Outcome Across Different Assessment Times Through Mixed Effects Models

**eTable 8.** Estimated Odds Ratio (OR) and 95% Confidence Intervals of the Motor Outcome Associated Variables Across Time Through Mixed-Effects Logistic Regression

**eReferences**

This supplementary material has been provided by the authors to give readers additional information about their work.

## **eMethods**

### **Statistical analysis.**

Selection of the best predictive model for 4.5-year WPPSI-IV FSIQ was performed through the method of “all possible equations,” which aims to find the best subset for linear regression. We allowed non-hierarchical submodels. All possible combinations of the independent variables were computed and evaluated to find a set of parameters for each subset. Mallows's Cp, Akaike Information Criteria (AIC), Schwarz Bayesian Criterion (BIC), R-squared (R2) and adjusted R-squared (R2Adj) were computed for each subset. With this method, we tested all the prenatal and postnatal clinical factors (SGA, GA, birth weight, magnesium sulfate administration, prenatal steroids, preeclampsia, gestational diabetes, histological chorioamnionitis, sex, severe IVH, punctate WMI volume, CLD, total ventilation days, retinopathy of prematurity, postnatal infection and postnatal cumulative dose of dexamethasone) and maternal level of education. Internal validation of the model was performed with cross-validation on the specified models in order to evaluate the model's ability to fit out-of-sample data. Standardized beta coefficients were estimated to compare the effect size of the different predictors of outcome. These are the regression coefficients obtained by first standardizing all variables to have a mean of 0 and a standard deviation of 1.

We then performed mixed linear regression models to test the selected model to the longitudinal measurements of cognitive IQ estimation (18- and 36-month Bayley-III and 4.5-year WPPSI-IV FSIQ) accounting for repeated measurements. We tested whether different ages at assessment would significantly change the slope of the cognitive scores. For that purpose, we compared the random slope and random intercept models using a likelihood ratio test of the null hypothesis  $H_0: \sigma_{u12} = \sigma_{u01} = 0$ . We accepted the null and select the random intercept model over the random slope model. Different ages at assessment did not meaningfully change the slope of cognitive scores. Allowing slopes to vary across individuals does not bring the predicted values closer to the observed values of cognitive scores for each individual. We also tested the interaction of maternal level of education with age at assessment, which was not significant. We therefore treated time as a categorical variable in the multivariate model. The obtained model treats an individual's repeated measurements of cognitive scores as a multivariate response giving us the parameters for the mean and variance of these scores at each occasion.

We performed the same stepwise approach to the motor outcome and once we found the best subset predictive of 4.5-year motor outcome (M-ABC2 centile rank), we then studied the longitudinal trajectory through. Since Bayley-III motor scores at 18 months and 36 months scale and standardization measurements differ from M-ABC2 percentile scores, when studying the longitudinal motor trajectory, we applied the best predictive model obtained at 4.5 years to the dichotomized motor outcome (motor outcome was considered adverse if M-ABC2 percentile score at 4.5 years  $\leq 15$  or if Bayley-III motor score  $\leq 85$  at 18 and 36 months).

### **Supplemental figures:**

**eFigure 1. Cohort flow**

Parents of eligible children occurred following pre-term birth and NICU admission. Approach was based on inclusion and exclusion criteria; the diagnosis of brain injury was based on the MRI scans that followed enrolment.

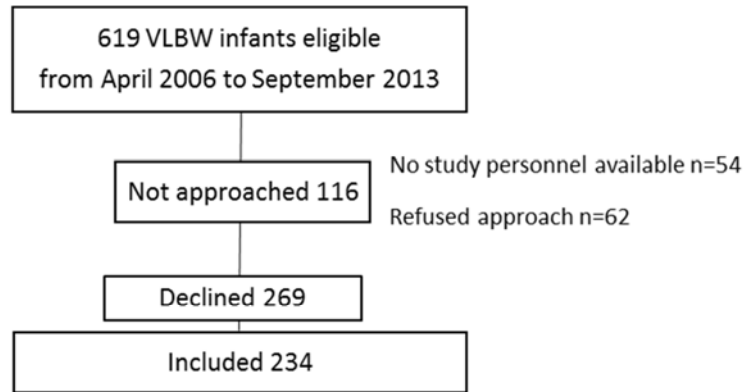

|                 | Included       | Eligible but not included |        |
|-----------------|----------------|---------------------------|--------|
| Gestational age | 27.6 (2.2)     | 28.6 (2.2)                | 0.0001 |
| Birth weight    | 1047.9 (323.0) | 1211.1 (381.7)            | 0.0001 |
| Sex (male)      | 120 (51.3)     | 64 (55.2)                 | 0.493  |

**eFigure 2. Predicted IQ according to maternal level of education and the presence of brain injury (adjusted for GA). The difference in neonates with and without brain injury is attenuated in children born to mothers with a postgraduate degree level of education**

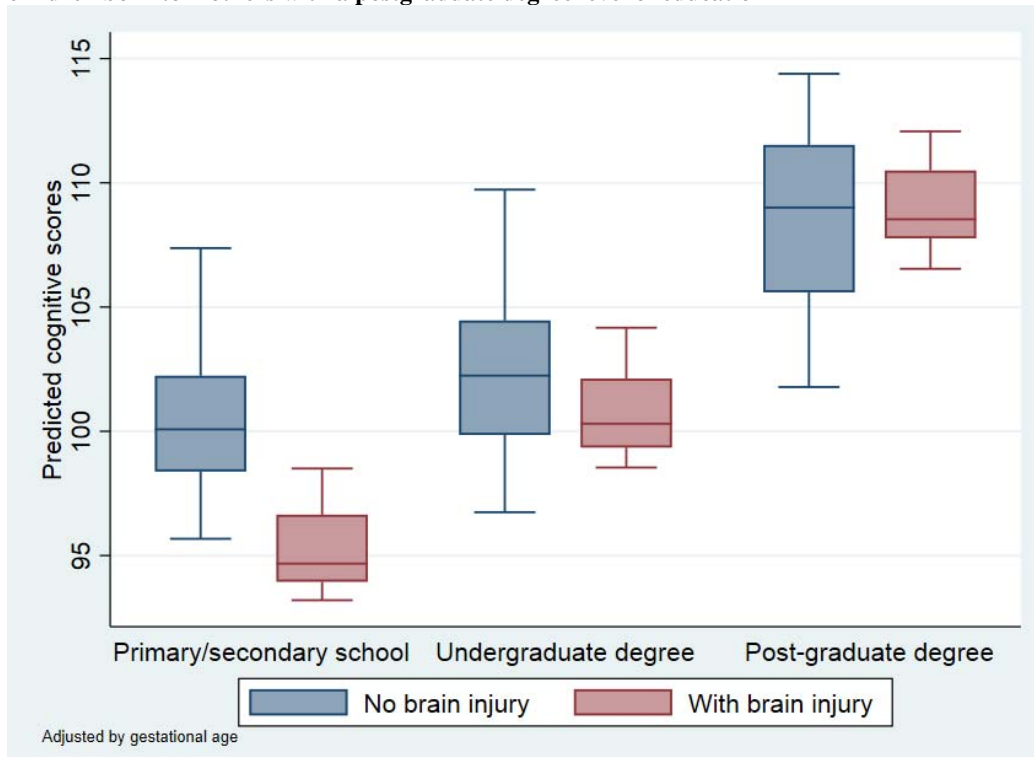

## Supplemental tables.

### Missing values description and approach

**eTable 1. Missing values on the dependent variables**

| Cognitive outcomes           | Valid data (%) | Missing data (%) |
|------------------------------|----------------|------------------|
| Cognitive score at 18 months | 199 (85.04)    | 35 (14.96)       |
| Cognitive score at 36 months | 187 (79.91)    | 47 (20.09)       |
| Cognitive score at 4.5 years | 170 (72.65)    | 64 (27.35)       |

*4.5-year cognitive outcome: potential selection bias given missing values<sup>1</sup>.*

Maternal level of education is known for 32 (50%) of the 64 patients with missing values on cognitive scores at 4.5 years with no distribution shift towards the lower SES group: 5 (15.6%) in primary/secondary school group, 23 (71.9%) in the undergraduate group and 4 (12.5%) in the post-graduate degree group.

**eTable 2. Agreement of the cognitive scores at different time points**

| Agreement of cognitive scores                  | ICC <sub>A</sub> | ICC <sub>A</sub> CI 95 % | ICC <sub>c</sub> | ICC <sub>c</sub> CI 95 % |
|------------------------------------------------|------------------|--------------------------|------------------|--------------------------|
| 18 m (Bayley III)- 36 months (Bayley III)      | 0.77             | 0.69- 0.83               | 0.78             | 0.70- 0.83               |
| 33 months (Bayley III)- 4.5 years (WPPSI FSIQ) | 0.69             | 0.58- 0.78               | 0.69             | 0.57- 0.78               |

Agreement of the cognitive scores at different time points (18 and 36 months, and 4.5 years) measured by intraclass coefficient (ICC<sub>C</sub>) and absolute agreement intraclass coefficient (ICC<sub>A</sub>)

Missing values on the independent variables

**eTable 3. Missing data of independent variables in the model related to cognitive scores at 4.5 years (n=170) as dependent variable:**

|                             | Missing values |
|-----------------------------|----------------|
| Maternal level of education | 4/170 (2.35%)  |
| Severe IVH                  | 4/170 (2.35%)  |
| Chronic lung disease        | 0              |
| Punctate WMI volume         | 0              |
| Gestational age             | 0              |

As illustrated in table 2 of the main manuscript, the model is based in 162 instead on 170 patients given 4 patients had no data on maternal level of education and 4 patients had no data on severe IVH. This table with a low rate of missing values is complemented by models applying multiple imputation for the independent variables (eTable 7).

**eTable 4. Estimated model after multiple imputation**

|                             | $\beta$ coeff (95% CI) | P     |
|-----------------------------|------------------------|-------|
| Gestational age             | 0.36 (-0.90- 1.62)     | 0.575 |
| Chronic lung disease        | -7.48 (-14.69 -0.26)   | 0.042 |
| Severe IVH                  | -22.73 (-37.12 -8.35)  | 0.02  |
| Punctate WMI volume         | -0.01 (-0.02 -0.004)   | 0.001 |
| Maternal level of education | 6.37 (1.82- 10.92)     | 0.006 |

Number of obs= 170; F(5, 162.0) = 6.42; P= 0.0001

**eTable 5.** Other indexes of SES and maternal ethnicity tested as independent variables with white matter injury, severe intraventricular hemorrhage, chronic lung disease and gestational age at birth for the prediction of FSIQ at 4.5 years: Maternal SES has a stronger impact in cognitive outcome than paternal SES, regardless of the variable used to measure SES.

| Index of SES                                                 | Coefficient | P value | Beta standardized coefficient |
|--------------------------------------------------------------|-------------|---------|-------------------------------|
| Maternal Hollingshead score                                  | 0.48        | 0.0001  | 0.31                          |
| Paternal Hollingshead score                                  | 0.24        | 0.025   | 0.17                          |
| Combined Hollingshead score                                  | 0.36        | 0.002   | 0.23                          |
| Maternal years of education                                  | 1.71        | 0.001   | 0.25                          |
| Paternal years of education                                  | 1.03        | 0.04    | 0.15                          |
| Maternal years of education and paternal years of education* | 1.44        | 0.012   | 0.21                          |
|                                                              | 0.41        | 0.465   | 0.06                          |
| Paternal level of education                                  | 3.02        | 0.039   | 0.16                          |
| Maternal ethnicity                                           | 0.02        | 0.982   | 0.002                         |

We estimated the Hollingshead's four-factor score, derived from both education and occupation information<sup>2</sup>. Both parents were scored separately, and a combined score was also calculated.

Each variable was tested in a separate multivariate model for the prediction of FSIQ at 4.5 years of age, including the variables shown to better predict the outcome with SES: white matter injury, severe intraventricular hemorrhage and chronic lung disease and gestational age at birth. Here we only express the parameters that each SES index showed in the multivariate model.

\*When including both maternal and paternal years of education as independent variables, only maternal years of education remained significant, the interaction term being non-significant (P=0.595).

**eTable 6. Regression model obtained for the 4.5 year-outcome final model applied to the 18 and 36 months cognitive outcome:** 18 month and 36 month cognitive outcomes evaluated given lower rates of missing values than the 4.5 year assessment

| <b>Cognitive scores at 18 months</b> |                        |        |            |
|--------------------------------------|------------------------|--------|------------|
|                                      | $\beta$ coeff (95% CI) | P      | $\beta$ st |
| Gestational age                      | 0.57 (-0.36-1.50)      | 0.226  | 0.10       |
| Chronic lung disease                 | -7.56 (-12.97- -2.15)  | 0.006  | 0.21       |
| Severe IVH                           | -7.14 (-18.95- 4.68)   | 0.235  | 0.08       |
| Punctate WMI volume                  | -0.01 (-0.01- -0.003)  | 0.001  | 0.25       |
| Maternal level of education          |                        |        |            |
| Primary/secondary school             | -2.96 (-8.63- 2.71)    | 0.305  | 0.22       |
| Undergraduate degree                 | Ref.                   | Ref.   |            |
| Postgraduate degree                  | 7.59 (2.51-12.68)      | 0.004  |            |
| <b>Cognitive scores at 36 months</b> |                        |        |            |
|                                      | $\beta$ coeff (95% CI) | P      | $\beta$ st |
| Gestational age                      | 0.40 (-0.58-1.38)      | 0.426  | 0.06       |
| Chronic lung disease                 | -3.28 (-9.01- 2.46)    | 0.261  | 0.09       |
| Severe IVH                           | -8.04 (-19.49- 3.41)   | 0.168  | 0.11       |
| Punctate WMI volume                  | -0.009 (-0.01- -0.004) | 0.0001 | 0.26       |
| Maternal level of education          |                        |        |            |
| Primary/secondary school             | -7.26 (-13.47- -1.05)  | 0.022  | 0.24       |
| Undergraduate degree                 | Ref.                   | Ref.   |            |
| Postgraduate degree                  | 5.33 (-0.11-10.77)     | 0.055  |            |

**eTable 7 Estimated cognitive outcome across different assessment times through mixed effects models.**

|                                                                      |                          | Adjusting for GA only                                                                      |         | Adjusting for GA and maternal level of education                                         |         | Adjusting for GA, maternal level of education, punctate WMI, severe IVH and CLD          |         |
|----------------------------------------------------------------------|--------------------------|--------------------------------------------------------------------------------------------|---------|------------------------------------------------------------------------------------------|---------|------------------------------------------------------------------------------------------|---------|
|                                                                      |                          | Number of obs= 556;<br>Number of patients = 208;<br>Log likelihood= -2141.94.<br>P= <0.001 |         | Number of obs= 537<br>Number of patients= 197<br>Log likelihood= -2068.1704<br>P= 0.0001 |         | Number of obs= 537<br>Number of patients= 197<br>Log likelihood= -2066.1076<br>P= 0.0001 |         |
|                                                                      |                          | Mean (95% CI)<br>cognitive scores                                                          | P value | Mean (95% CI)<br>cognitive scores                                                        | P value | Mean (95% CI) cognitive scores                                                           | P value |
| Cognitive score at 18 m                                              |                          | 105.0 (103.1- 106.8)                                                                       | 0.001   | 104.5 (102.2- 106.7)                                                                     | 0.001   | 106.0 (103.6-108.4)                                                                      | 0.001   |
| Cognitive score at 36 m                                              |                          | 102.2 (100.3- 104.2)                                                                       | 0.001   | 101.9 (99.6- 104.2)                                                                      | 0.001   | 103.3 (100.9-105.8)                                                                      | 0.001   |
| Cognitive score at 4.5 y                                             |                          | 101.7 (99.7- 103.8)                                                                        | 0.001   | 101.5 (99.2- 103.9)                                                                      | 0.001   | 103.2 (100.7-105.7)                                                                      | 0.001   |
| Gestational age (centered at a gestational age at birth of 28 weeks) |                          | 1.0 (0.3-1.8)                                                                              | 0.007   | 1.0 (0.3- 1.7)                                                                           | 0.01    | 0.6 (-0.2- 1.4)                                                                          | 0.17    |
| Maternal level of education                                          | Primary/secondary school |                                                                                            |         | -4.1 (-9.0- 0.8)                                                                         | 0.10    | -4.5 (-9.3- -0.4)                                                                        | 0.007   |
|                                                                      | Undergraduate degree     |                                                                                            |         | Ref.                                                                                     | Ref.    | Ref.                                                                                     | Ref.    |
|                                                                      | Postgraduate degree      |                                                                                            |         | 5.2 (0.6- 9.7)                                                                           | 0.03    | 6.4 (2.0-10.7)                                                                           | 0.004   |
| Brain injury                                                         | Punctate WMI volume      |                                                                                            |         |                                                                                          |         | -0.01 (-0.01- -0.004)                                                                    | 0.001   |
|                                                                      | Severe IVH               |                                                                                            |         |                                                                                          |         | -7.7 (-17.1- 1.8)                                                                        | 0.11    |
| Chronic lung disease                                                 |                          |                                                                                            |         |                                                                                          |         | -5.9 (-10.5- -1.3)                                                                       | 0.01    |

GA: gestational age. WMI: white matter injury. IVH: intraventricular hemorrhage.



**eTable 8. Estimated odds ratio (OR) and 95% confidence intervals of the motor outcome associated variables across time through mixed-effects logistic regression.**

|                                                                                                                                                               | OR (95% CI)          | P      |
|---------------------------------------------------------------------------------------------------------------------------------------------------------------|----------------------|--------|
| Number of observations= 520<br>Number of groups (id)= 195<br>Wald chi2(5) = 36.88<br>Log likelihood = -220.29<br>P = 0.0001<br>AUC = 0.95 (95% CI 0.94-0.97). |                      |        |
| Small for gestational age                                                                                                                                     | 5.1 (1.8- 14.8)      | 0.002  |
| Gestational age                                                                                                                                               | 0.8 (0.6- 0.9)       | 0.007  |
| Severe IVH (grade 3)                                                                                                                                          | 12.1 (1.6- 90.1)     | 0.02   |
| Punctate WMI volume                                                                                                                                           | 1.003 (1.001- 1.004) | <0.001 |
| Chronic lung disease                                                                                                                                          | 4.8 (1.7- 13.5)      | 0.003  |

Adverse motor outcome was considered if M-ABC2 centile rank at 4.5 years  $\leq 15$  or if Bayley-III motor score  $\leq 85$  at 18 and 36 months.

## References

1. Callanan C, Doyle L, Rickards A, Kelly E, Ford G, Davis N. Children followed with difficulty: how do they differ? *J Paediatr Child Health*. 2001;37(2):152-156.
2. Hollingshead AB. Four factor index of social status. In: Yale University, New Haven, CT; 1975.
